# Supplementary material
Source: PubMed Central journal article supplement (PMC5003645)
Supplement: NIHMS773117-supplement-01.pdf [file NIHMS773117-supplement-01.pdf]

**Supplemental Table 1.** Classification of pregnancy-associated mortality by ICD-10 code among women with unknown pregnancy status.

| <b>Temporality</b>   | <b>ICD-10 Codes</b>                                                                                                           | <b>Definition</b>                                                                     |
|----------------------|-------------------------------------------------------------------------------------------------------------------------------|---------------------------------------------------------------------------------------|
| Pregnancy            | O001, O009, O019, O021,<br>O035, O036, O039,<br>O063, O068, O069, O077                                                        | Pregnancy with abortive outcome                                                       |
|                      | O210, O223, O225, O229,<br>O235, O244, O249, O269                                                                             | Other maternal disorders predominantly related to pregnancy                           |
|                      | O364, O441, O459, O460,<br>O468, O469                                                                                         | Maternal care related to the fetus and amniotic cavity and possible delivery problems |
|                      | O622, O711                                                                                                                    | Complications of labor and delivery                                                   |
|                      | O720, O721                                                                                                                    | Postpartum hemorrhage                                                                 |
|                      | O850                                                                                                                          | Puerperal sepsis                                                                      |
|                      | O903                                                                                                                          | Cardiomyopathy in the puerperium                                                      |
| Postpartum           | O908                                                                                                                          | Other classification of the puerperium not elsewhere classified                       |
|                      | O96                                                                                                                           | Death from any cause occurring more than 42 days but less than 1 year from delivery   |
|                      |                                                                                                                               |                                                                                       |
| Timing indeterminate | O266, O268, O364, O690,<br>O753, O754, O759, O881,<br>O882, O95, , O985, O988,<br>O990, O991, O992, O993,<br>O994, O996, O998 |                                                                                       |

**Supplemental Table 2.** ICD-10 codes grouped by cause of death for natural (including obstetrical causes), transport-related injuries, other injuries, suicide, homicide, and other external causes.

| Cause of death                    | ICD-10 Codes                                             |
|-----------------------------------|----------------------------------------------------------|
| <b>Natural</b>                    | A00-R99                                                  |
| <b>Transport-related injuries</b> | V01-V99, Y850 - Y859                                     |
| <b>Other injuries</b>             | W00-X59, Y860                                            |
| <b>Suicide</b>                    | X60-X84, Y870                                            |
| <b>Homicide</b>                   | X85-Y09, Y871                                            |
| <b>Other external causes</b>      | Y10-Y34, Y35-Y36, Y40-Y84, Y872, Y880 - Y883, Y890, Y899 |
